# Supplementary material
Source: publisher figshare collection journal article supplement (https://tandf.figshare.com/ndownloader/files/15327650)
Supplement: Supplementary file 1 [file 15327650]

## Sheet: OFT ant
Supplement Table S4: Results of ophthalmological examination of Usher syndrome Russian cohort. Anterior segment of the eye.
Patient ID	USH Type	BCVA		IOP		Refraction	Anterior segment
		OD	OS	OD	OS
1	2	0,3	0,4	15	17	OD sph-1.87 cyl-1.50ax 11 OS sph-0.37 cyl-2.12ax 0	no specific findings
2	1	0.1	0.05	11	13	OD-sph+1.5 cyl-1.62ax 0 OS n/a	OU opacity in the cortex of the lens
3	other syndrome	0.02	0.02	13	12	OD sph-4.0 OS sph-4.0	convergent strabismus,Grishberg angle> 60 degrees, horizontal nystagmus. OD- opacity in the cortex of the lens
4	2	pr l certae	pr l certae	normal	normal	na	na
5	2	pr l certae	pr l certae	13	11	OD sph+0.87 cyl-0.37ax 30 OS sph+0.62 cyl-1.75ax 158	OU- posterior chamber IOL
6	1	pr l certae	pr l certae	11	10	OD-sph+2.75 cyl-1.25ax 20 OS n/a	OS- sclero-conjunctival adhesion, OU- opacity in the cortex of the lens
7	1	0	pr l incertae	n/a	n/a	n/a	OD- posterior chamber IOL, blood clots In vitreous OS-total opacity of the lens
8	2	pr l certae	pr l certae	12	17	OD sph+1.25 cyl-1.62 ax 55 OS sph-2.0 cyl-4.12ax 44	OD- center opacities under the lens posterior capsule OS-posterior chamber IOL
9	2	0,2	0,2	n/a	n/a	OD sph+2.37 cyl-1.0 ax 22 OS n/a	opacities under the lens posterior capsule and cortex
10	1	0,3	0,3	12	14	OD sph+0.37 cyl-1.0 ax 7 OS sph+0.87 cyl-1.12ax 167	OU- posterior chamber IOL, fibrosis of the posterior capsule
11	2	Hand motion	Hand motion	25	17	OD sph- 1.37 cyl-0.25 ax 79 OS sph-2.75	OU- posterior chamber IOL, Elshnig pearls
12	2	0,4	0,4	12,7	13	n/a	opacities under the lens posterior capsule
13	1	pr l certae	pr l certae	normal	normal	na	na
14	other syndrome	pr l certae	pr l certae	n/a	n/a	n/a	OU opacity in the cortex of the lens
15	1	pr l incertae	pr l incertae	10	11	OD sph-3,0 cyl-3.75 ax 122 OS sph+12.87 cyl-9.12ax 72	OU- posterior chamber IOL, OD- fibrosis at the periphery, OS-completely fibrosed, the IOL is inserted into the iris and protrude into the anterior chamber 12-16 o'clock.
16	1	0,4	0,4	17	20	OD sph-3,0 cyl-3.75 ax 122 OS sph+12.87 cyl-9.12ax 72	OS- opacities under the lens posterior capsule
17	2	0,2	0,3	14	17	OD sph-6,25 cyl-2.0 ax 10 OS sph-6.75 cyl-2.25ax 172	OU- opacities under the lens posterior capsule
18	1	0,3	0,04	20	20	OD sph+12,25 cyl-0.62 ax 70 OS n/a	OD - No fixation, the deviation along Hirschberg 30 degrees temporally OU- afakia ?
19	1	Counting fingers	Counting fingers	14,7	21	OD sph+11,12 cyl-1.00 ax 179 OS n/a	OD- at 5-7 o'clock in the paraptic and optical zone, roughness and defects of the corneal epithelium, aphakia. OS- Strabismus: Hirschberg deflection> 60 degrees, Pupil: pulled up at 11 o'clock, poor light reaction, afakia
20	2	0.01	0.01	normal	normal	na	na
21	1	pr l certae	pr l certae	normal	normal	na	na
22	1	0.01	pr l certae	normal	normal	na	na
23	1	0,2	0,2	22	24	OD sph+0,12 cyl-2.5 ax 7 OS sph+0.37 cyl-2.5ax 5	OD - opacification under posterior capsule, vacuoles, "needles"
24	2	0,4	0,3	11,3	11,3	OD sph-10,25 cyl-1.0 ax 105 OS sph-8.75 cyl-1.5ax 75	OUSpatial opacities under the posterior capsule of the lens
25	1	Hand motion	pr. l. certae	18	17	OD sph+4,0 cyl-2.5 ax 172 OS sph+4.5 cyl-2.75ax 16	no specific findings
26	1	pr l certae	pr l certae	normal	normal	na	na
27	1	0,01	0,05	24	35	OD sph+7,12 cyl-1.5 ax 160 OS sph+12.12 cyl-0.87 ax 107	OD-Conjunctiva: 12-14 o'clock sclero-conjunctival adhesion. Pterygium 1 degree at 2 hours on the cornea. Cornea: at 2 o'clock on the limb- scar.Pupil: uneven, pulled up at 7 o'clock. Lens: aphakia, hernia of the vitreous, fibrosis. OS-Conjunctiva: sclero-conjunctival splicing at 2 o'clock. Front camera: uneven. Iris: coloboma on 11 o'clock. Lens: aphakia, hernia of the vitreous, fibrosis.
28	2	0,9	0,9	16	19	OD sph-2,37 cyl-0.62 ax 4 OS sph-1.50 cyl-1.12 ax 178	OU- cornea: linear opacities (11 incisions after keratotomy)
BCVA - best corrected visual acuity, IOP - intraocluar pressure, IOL - intraocular lense, OD, OS - oculus dexter / sinister (right and left eye), OU oculi utriusque - both eyes
